# Supplementary material for: Modeling the response of Northwest Greenland to enhanced ocean thermal forcing and subglacial discharge
Source: Copernicus journal article supplement (doi:10.5194/tc-2018-214), 2018-10-26
Supplement: Supplementary file 1 [file tc-2018-214-supplement.pdf]

| Glacier name             | 2017 velocity (m/yr) |         | Projected 2030 velocity (m/yr) |                    |                    |                    |                    |                    |                    |                    |                    |                     |                    |                    |                    |                    |                    |                    |                    |                    |                    |                     |                    |                    |                    |                    |                    |                    |                    |                    |                    |                     |                    |                    |                    |                    |                    |           |              |              |              |                        | Characteristics (2007) |                    |                    |                    |                     |
|--------------------------|----------------------|---------|--------------------------------|--------------------|--------------------|--------------------|--------------------|--------------------|--------------------|--------------------|--------------------|---------------------|--------------------|--------------------|--------------------|--------------------|--------------------|--------------------|--------------------|--------------------|--------------------|---------------------|--------------------|--------------------|--------------------|--------------------|--------------------|--------------------|--------------------|--------------------|--------------------|---------------------|--------------------|--------------------|--------------------|--------------------|--------------------|-----------|--------------|--------------|--------------|------------------------|------------------------|--------------------|--------------------|--------------------|---------------------|
|                          | Observed             | Modeled | TF +0°C                        |                    |                    |                    |                    |                    |                    |                    |                    |                     | TF +1°C            |                    |                    |                    |                    |                    |                    |                    |                    |                     | TF +2°C            |                    |                    |                    |                    |                    |                    |                    |                    |                     | TF +3°C            |                    |                    |                    |                    | Bed depth | speed (m/yr) | melt (m/day) | calving rate | σ <sub>max</sub> (kPa) |                        |                    |                    |                    |                     |
|                          |                      |         | q <sub>ig</sub> x1             | q <sub>ig</sub> x2 | q <sub>ig</sub> x3 | q <sub>ig</sub> x4 | q <sub>ig</sub> x5 | q <sub>ig</sub> x6 | q <sub>ig</sub> x7 | q <sub>ig</sub> x8 | q <sub>ig</sub> x9 | q <sub>ig</sub> x10 | q <sub>ig</sub> x1 | q <sub>ig</sub> x2 | q <sub>ig</sub> x3 | q <sub>ig</sub> x4 | q <sub>ig</sub> x5 | q <sub>ig</sub> x6 | q <sub>ig</sub> x7 | q <sub>ig</sub> x8 | q <sub>ig</sub> x9 | q <sub>ig</sub> x10 | q <sub>ig</sub> x1 | q <sub>ig</sub> x2 | q <sub>ig</sub> x3 | q <sub>ig</sub> x4 | q <sub>ig</sub> x5 | q <sub>ig</sub> x6 | q <sub>ig</sub> x7 | q <sub>ig</sub> x8 | q <sub>ig</sub> x9 | q <sub>ig</sub> x10 | q <sub>ig</sub> x1 | q <sub>ig</sub> x2 | q <sub>ig</sub> x3 | q <sub>ig</sub> x4 | q <sub>ig</sub> x5 |           |              |              |              |                        | q <sub>ig</sub> x6     | q <sub>ig</sub> x7 | q <sub>ig</sub> x8 | q <sub>ig</sub> x9 | q <sub>ig</sub> x10 |
| 1 Sverdrup Gletscher     | 2834                 | 2519    | 3351                           | 3318               | 3992               | 4542               | 4631               | 3921               | 4870               | 4458               | 4824               | 5253                | 5226               | 4436               | 4237               | 4205               | 4191               | 4207               | 4197               | 3996               | 3871               | 3901                | 4150               | 4174               | 3851               | 3840               | 3988               | 4086               | 3948               | 3685               | 4244               | 4886                | 3860               | 4123               | 4229               | 4529               | 4907               | 4638      | 4516         | 4258         | 4220         | 4191                   | -451                   | 2350               | 1.28               | 1883               | 625                 |
| 2 Dietrichson Gletscher  | 2617                 | 1817    | 1525                           | 1557               | 2601               | 1527               | 2583               | 2072               | 2617               | 2419               | 2306               | 2490                | 1995               | 1760               | 1818               | 1775               | 1637               | 1598               | 1628               | 1633               | 1518               | 1490                | 1458               | 1264               | 1435               | 1667               | 1809               | 2076               | 2094               | 2116               | 2190               | 2266                | 2082               | 2924               | 3998               | 3864               | 3662               | 3341      | 3227         | 3402         | 3373         | 3702                   | -236                   | 1920               | 0.726              | 1655               | 663                 |
| 3 Steenstrup Gletscher   | 5698                 | 2791    | 3241                           | 8953               | 7018               | 6985               | 6633               | 5541               | 5843               | 5472               | 5851               | 5196                | 4530               | 5298               | 4805               | 4834               | 5163               | 5244               | 5084               | 5051               | 4479               | 4261                | 4801               | 3811               | 3624               | 3732               | 3615               | 3299               | 3239               | 3208               | 3181               | 3164                | 3628               | 3073               | 3003               | 2932               | 2824               | 2784      | 2768         | 2757         | 2728         | 2695                   | -319                   | 2590               | 0.853              | 2279               | 573                 |
| 4 Kjer Gletscher         | 1370                 | 1101    | 4986                           | 5814               | 5142               | 5339               | 5209               | 3909               | 3972               | 5338               | 5300               | 5112                | 5126               | 4666               | 4603               | 4960               | 4654               | 4543               | 4780               | 4771               | 4919               | 4892                | 4696               | 4345               | 4179               | 4184               | 4058               | 3664               | 3455               | 3580               | 3494               | 3619                | 3489               | 2945               | 2886               | 2854               | 2772               | 2798      | 2709         | 2826         | 2796         | 2754                   | -252                   | 1080               | 0.784              | 794                | 385                 |
| 5 Hayes Gletscher N      | 683                  | 602     | 4487                           | 1261               | 1028               | 1614               | 1661               | 1488               | 2339               | 2640               | 2602               | 3102                | 1644               | 2772               | 2811               | 3218               | 3510               | 3655               | 3784               | 3806               | 4039               | 3941                | 3322               | 3775               | 3792               | 3952               | 3620               | 3589               | 4634               | 4660               | 4984               | 5082                | 3817               | 3907               | 5558               | 5070               | 5038               | 6061      | 6188         | 7623         | 7009         | 8504                   | -161                   | 240                | 0.561              | 35                 | 650                 |
| 6 Hayes Gletscher        | 3440                 | 2964    | 8092                           | 6068               | 5977               | 7610               | 7564               | 8412               | 4307               | 2641               | 2710               | 1945                | 7249               | 2436               | 2320               | 1768               | 1523               | 1429               | 1405               | 1410               | 1379               | 1293                | 1657               | 1407               | 1380               | 1295               | 1250               | 1229               | 1197               | 1172               | 1169               | 1166                | 1411               | 1250               | 1206               | 1169               | 1155               | 1185      | 1201         | 1363         | 1740         | 1771                   | -370                   | 2910               | 1.28               | 2443               | 681                 |
| 7 Unnamed south Hayes N  | 1130                 | 573     | 727                            | 1035               | 1144               | 2147               | 2219               | 1952               | 3036               | 3339               | 3308               | 4821                | 2187               | 3493               | 3591               | 5526               | 6378               | 7314               | 8253               | 7968               | 8224               | 8562                | 5888               | 7983               | 8184               | 8571               | 7605               | 7714               | 8033               | 7871               | 7786               | 6992                | 8176               | 7537               | 7902               | 7810               | 7050               | 7517      | 7109         | 7640         | 8075         | 8165                   | -331                   | 961                | 1.1                | 560                | 940                 |
| 8 Unnamed south Hayes M  | 3132                 | 2902    | 2623                           | 2501               | 2346               | 2209               | 2318               | 2587               | 2833               | 2767               | 2746               | 2723                | 2740               | 3103               | 3083               | 3359               | 3542               | 3510               | 3375               | 3026               | 3657               | 3099                | 3534               | 3279               | 3042               | 2887               | 2820               | 2785               | 2777               | 2782               | 2743               | 2685                | 2844               | 2642               | 2681               | 2596               | 2500               | 2362      | 2383         | 2325         | 2377         | 2409                   | -500                   | 2900               | 1.23               | 2451               | 1000                |
| 9 Unnamed south Hayes SS | 1282                 | 1081    | 693                            | 650                | 643                | 634                | 632                | 627                | 608                | 613                | 612                | 608                 | 596                | 559                | 564                | 525                | 526                | 540                | 517                | 510                | 511                | 2631                | 750                | 712                | 1655               | 869                | 924                | 1908               | 2044               | 2127               | 2122               | 2551                | 2254               | 2567               | 2536               | 2859               | 2778               | 2631      | 2622         | 2557         | 2525         | 2680                   | -206                   | 1010               | 0.676              | 763                | 523                 |
| 10 Alison Gletscher      | 4018                 | 3651    | 3679                           | 3569               | 3557               | 3623               | 3569               | 3110               | 3196               | 3198               | 3164               | 3190                | 2656               | 2500               | 1497               | 1286               | 1237               | 1227               | 1210               | 1165               | 1218               | 745                 | 944                | 925                | 765                | 752                | 727                | 754                | 751                | 748                | 743                | 736                 | 765                | 743                | 736                | 731                | 722                | 698       | 695          | 689          | 686          | 684                    | -533                   | 2570               | 1.46               | 2037               | 739                 |
| 11 Illullip Sermia       | 4683                 | 3621    | 3596                           | 3649               | 3643               | 3575               | 3570               | 3406               | 3380               | 3350               | 3064               | 3027                | 3420               | 3195               | 2927               | 2854               | 2829               | 2807               | 2723               | 2697               | 2750               | 2589                | 2867               | 2711               | 2701               | 2695               | 2851               | 2714               | 2784               | 2780               | 2765               | 2765                | 3355               | 2770               | 2782               | 2789               | 2778               | 2762      | 2741         | 2697         | 2696         | 2693                   | -362                   | 3870               | 1.38               | 3366               | 803                 |
| 12 Cornell Gletscher     | 1370                 | 643     | 814                            | 812                | 811                | 806                | 807                | 810                | 806                | 808                | 806                | 819                 | 829                | 824                | 821                | 807                | 805                | 803                | 801                | 801                | 803                | 802                 | 757                | 754                | 751                | 736                | 736                | 728                | 727                | 725                | 723                | 722                 | 643                | 638                | 634                | 629                | 626                | 606       | 605          | 603          | 601          | 600                    | -478                   | 619                | 0.946              | 274                | 1200                |
| 13 Ussing Bræer N        | 1233                 | 1093    | 2110                           | 2160               | 2197               | 2169               | 2613               | 2506               | 2491               | 2547               | 2510               | 2572                | 2551               | 3032               | 3033               | 3172               | 3223               | 3218               | 3220               | 3219               | 3235               | 3214                | 3276               | 3248               | 3230               | 3214               | 3216               | 3212               | 3219               | 3215               | 3212               | 3216                | 3220               | 3256               | 3335               | 3312               | 3323               | 3309      | 3317         | 3333         | 3335         | 3333                   | -421                   | 1090               | 1.35               | 597                | 1200                |
| 14 Ussing Bræer          | 1997                 | 1579    | 2100                           | 2113               | 2138               | 2123               | 2093               | 2108               | 2097               | 2103               | 2091               | 2088                | 2083               | 2064               | 2066               | 1947               | 2067               | 1934               | 1917               | 1920               | 1878               | 1909                | 1948               | 1932               | 3103               | 2513               | 3164               | 2906               | 2736               | 2666               | 2534               | 2497                | 2524               | 2467               | 2500               | 2585               | 2666               | 2731      | 2635         | 2621         | 2622         | 2659                   | -315                   | 2000               | 1.28               | 1533               | 900                 |
| 15 Qeqertarsuup Sermia   | 4117                 | 829     | 944                            | 949                | 1002               | 1001               | 996                | 997                | 1000               | 1000               | 1001               | 1008                | 1015               | 1026               | 1178               | 1218               | 1244               | 1227               | 1283               | 1276               | 1336               | 1317                | 1386               | 1408               | 1298               | 1318               | 1354               | 1355               | 1351               | 1378               | 1390               | 1321                | 1288               | 1257               | 1248               | 1240               | 1241               | 1246      | 1234         | 1239         | 1236         | 1234                   | -215                   | 680                | 0.858              | 367                | 1100                |
| 16 Kakivfaat Sermiat     | 4023                 | 2525    | 5228                           | 6276               | 5585               | 5327               | 5224               | 5192               | 5175               | 5132               | 5066               | 5088                | 5150               | 5028               | 4252               | 4277               | 4329               | 4217               | 4283               | 4282               | 4613               | 4400                | 4262               | 4254               | 4491               | 4514               | 4489               | 4422               | 4484               | 4464               | 4421               | 4447                | 4505               | 4497               | 4497               | 4471               | 4502               | 4592      | 4488         | 4415         | 4406         | 3779                   | -491                   | 2510               | 1.44               | 1984               | 927                 |
| 17 Upernavik Isstrøm N   | 5704                 | 5349    | 11499                          | 11104              | 10997              | 11181              | 10420              | 9901               | 9800               | 9024               | 9077               | 9047                | 10918              | 9957               | 11083              | 10107              | 10092              | 10029              | 10053              | 10025              | 9951               | 9865                | 9815               | 10090              | 9912               | 9886               | 9850               | 9797               | 9765               | 9806               | 9840               | 9836                | 10036              | 9836               | 9757               | 9809               | 9658               | 9674      | 9776         | 9770         | 9632         | 9746                   | -538                   | 3930               | 1.88               | 3244               | 967                 |
| 18 Upernavik Isstrøm C   | 3633                 | 3179    | 4505                           | 7009               | 6553               | 6334               | 6380               | 6139               | 6739               | 6937               | 6812               | 6872                | 6607               | 7078               | 6923               | 6609               | 6528               | 6541               | 6486               | 6844               | 6433               | 7219                | 6820               | 6531               | 6454               | 6654               | 6655               | 6631               | 6839               | 6635               | 6585               | 6598                | 6614               | 6665               | 6629               | 6613               | 6827               | 6915      | 6696         | 6476         | 6660         | 6964                   | -504                   | 3290               | 1.85               | 2615               | 853                 |
| 19 Upernavik Isstrøm S   | 2795                 | 2150    | 2237                           | 2236               | 2180               | 2233               | 2548               | 2807               | 3816               | 3761               | 4707               | 4625                | 3378               | 4583               | 4325               | 4375               | 4317               | 4302               | 4399               | 4521               | 5031               | 5156                | 4435               | 4875               | 6455               | 6597               | 6903               | 6766               | 6996               | 8091               | 9038               | 9324                | 6699               | 6950               | 9409               | 10313              | 12993              | 11656     | 10639        | 10546        | 9444         | 9594                   | -327                   | 2730               | 1.18               | 2299               | 770                 |

| Glacier name            | 2017 velocity (m/yr) |         | Projected 2100 velocity (m/yr) |                    |                    |                    |                    |                    |                    |                    |                    |                     |                    |                    |                    |                    |                    |                    |                    |                    |                    |                     |                    |                    |                    |                    |                    |                    |                    |                    |                    |                     |                    |                    |                    |                    |                    |           |              |              |              |                        | Characteristics (2007) |                    |                    |                    |                     |
|-------------------------|----------------------|---------|--------------------------------|--------------------|--------------------|--------------------|--------------------|--------------------|--------------------|--------------------|--------------------|---------------------|--------------------|--------------------|--------------------|--------------------|--------------------|--------------------|--------------------|--------------------|--------------------|---------------------|--------------------|--------------------|--------------------|--------------------|--------------------|--------------------|--------------------|--------------------|--------------------|---------------------|--------------------|--------------------|--------------------|--------------------|--------------------|-----------|--------------|--------------|--------------|------------------------|------------------------|--------------------|--------------------|--------------------|---------------------|
|                         | Observed             | Modeled | TF +0°C                        |                    |                    |                    |                    |                    |                    |                    |                    |                     | TF +1°C            |                    |                    |                    |                    |                    |                    |                    |                    |                     | TF +2°C            |                    |                    |                    |                    |                    |                    |                    |                    |                     | TF +3°C            |                    |                    |                    |                    | Bed depth | speed (m/yr) | melt (m/day) | calving rate | σ <sub>max</sub> (kPa) |                        |                    |                    |                    |                     |
|                         |                      |         | q <sub>ig</sub> x1             | q <sub>ig</sub> x2 | q <sub>ig</sub> x3 | q <sub>ig</sub> x4 | q <sub>ig</sub> x5 | q <sub>ig</sub> x6 | q <sub>ig</sub> x7 | q <sub>ig</sub> x8 | q <sub>ig</sub> x9 | q <sub>ig</sub> x10 | q <sub>ig</sub> x1 | q <sub>ig</sub> x2 | q <sub>ig</sub> x3 | q <sub>ig</sub> x4 | q <sub>ig</sub> x5 | q <sub>ig</sub> x6 | q <sub>ig</sub> x7 | q <sub>ig</sub> x8 | q <sub>ig</sub> x9 | q <sub>ig</sub> x10 | q <sub>ig</sub> x1 | q <sub>ig</sub> x2 | q <sub>ig</sub> x3 | q <sub>ig</sub> x4 | q <sub>ig</sub> x5 | q <sub>ig</sub> x6 | q <sub>ig</sub> x7 | q <sub>ig</sub> x8 | q <sub>ig</sub> x9 | q <sub>ig</sub> x10 | q <sub>ig</sub> x1 | q <sub>ig</sub> x2 | q <sub>ig</sub> x3 | q <sub>ig</sub> x4 | q <sub>ig</sub> x5 |           |              |              |              |                        | q <sub>ig</sub> x6     | q <sub>ig</sub> x7 | q <sub>ig</sub> x8 | q <sub>ig</sub> x9 | q <sub>ig</sub> x10 |
| 1 Sverdrup Gletscher    | 2834                 | 2519    | 2939                           | 2353               | 2129               | 2132               | 2133               | 2090               | 2083               | 2037               | 2042               | 2031                | 2018               | 1996               | 2008               | 1996               | 2200               | 2187               | 2172               | 2935               | 2941               | 2923                | 2987               | 2940               | 2962               | 2917               | 2942               | 2890               | 2927               | 2923               | 2884               | 2929                | 2904               | 2943               | 2882               | 2867               | 2870               | 2867      | 2882         | 2858         | 2890         | 2887                   | -451                   | 2350               | 1.28               | 1883               | 625                 |
| 2 Dietrichson Gletscher | 2617                 | 1817    | 1142                           | 1452               | 1449               | 1449               | 1448               | 1438               | 1441               | 3938               | 3936               | 3829                | 3907               | 3804               | 4408               | 3798               | 3781               | 3911               | 3775               | 4356               | 3843               | 3888                | 3931               | 3916               | 3742               | 3812               | 3807               | 3861               | 3709               | 3706               | 3782               | 3860                | 4334               | 4026               | 4301               | 4295               | 3694               | 3764      | 3835         | 3828         | 3826         | 3837                   | -236                   | 1920               | 0.726              | 1655               | 663                 |
| 3 Steenstrup Gletscher  | 5698                 | 2791    | 1696                           | 1666               | 1662               | 1627               | 1659               | 1652               | 1601               | 1565               | 1555               | 1544                | 1588               | 1544               | 1534               | 1540               | 1521               | 1562               | 1562               | 1522               | 1516               | 1502                | 1563               | 1527               | 1504               | 1453               | 1477               | 1482               | 1412               | 1402               | 1401               | 1431                | 1444               | 1421               | 1395               | 1392               | 1391               | 1379      | 1371         | 1373         | 1372         | 1373                   | -319                   | 2590               | 0.853              | 2279               | 573                 |
| 4 Kjer Gletscher        | 1370                 | 1101    | 757                            | 632                | 635                | 693                | 670                | 687                | 686                | 676                | 675                | 659                 | 620                | 614                | 601                | 611                | 588                | 621                | 556                | 605                | 544                | 611                 | 631                | 545                | 614                | 618                | 612                | 579                | 585                | 580                | 566                | 574                 | 535                | 521                | 529                | 523                | 520                | 510       | 511          | 502          | 501          | 499                    | -252                   | 1080               | 0.784              | 794                | 385                 |
| 5 Hayes Gletscher N     | 683                  | 602     | 2273                           | 2163               | 2076               | 2088               | 2086               | 2077               | 2047               | 2060               | 2050               | 2029                | 2053               | 2024               | 2048               | 2032               | 2008               | 2004               | 2005               | 2388               | 2384               | 2381                | 1997               | 1741               | 3292               | 3228               | 3214               | 3107               | 3150               | 3140               | 3059               | 3135                | 3213               | 3167               | 3057               | 3117               | 3112               | 3032      | 2267         | 3081         | 3080         | 3078                   | -161                   | 240                | 0.561              | 35                 | 650                 |
| 6 Hayes Gletscher       | 3440                 | 2964    | 2135                           | 2057               | 2339               | 2225               | 2216               | 2218               | 2303               | 2228               | 2333               | 2294                |                    |                    |                    |                    |                    |                    |                    |                    |                    |                     |                    |                    |                    |                    |                    |                    |                    |                    |                    |                     |                    |                    |                    |                    |                    |           |              |              |              |                        |                        |                    |                    |                    |                     |
